# Supplementary material for: Continuous time boolean modeling for biological signaling: application of Gillespie algorithm
Source: PubMed Central journal article supplement (PMC3517402; doi:10.1186/1752-0509-6-116), 2012-08-29

# Model of the mammalian cell cycle with 3 different tools

Original publication:

A.Fauré, A.Naldi, C.Chauviya, D.Thieffy . Dynamical analysis of a generic Boolean model for the control of the mammalian cell cycle. Bioinformatics (2006); 22(14): 124-131

## (1) GINsim results

Two asymptotic behaviors:

- With CycD = 0: one stable steady state (G1 arrest : Rb=1, p27=1, Cdh1=1)
- With CycD = 1: unique multi-cycle attractor

For CycD = 1, the state transition graphs according to two different updating strategies: synchronous and asynchronous are shown:

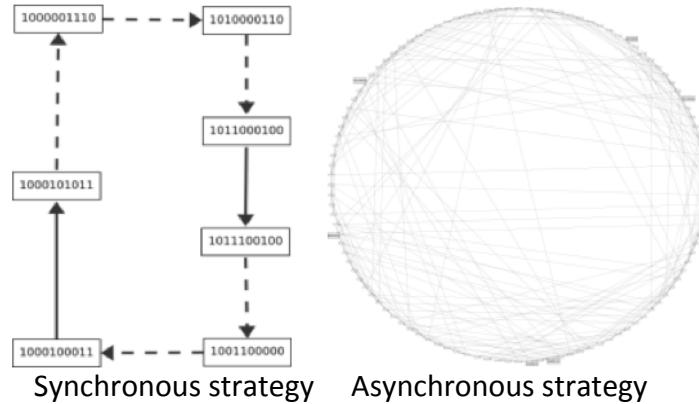

## (2) BoolNet results

Two asymptotic behaviors are observed according to the initial state of CycD  
(Note that BoolNet provides computations with synchronous update strategy)

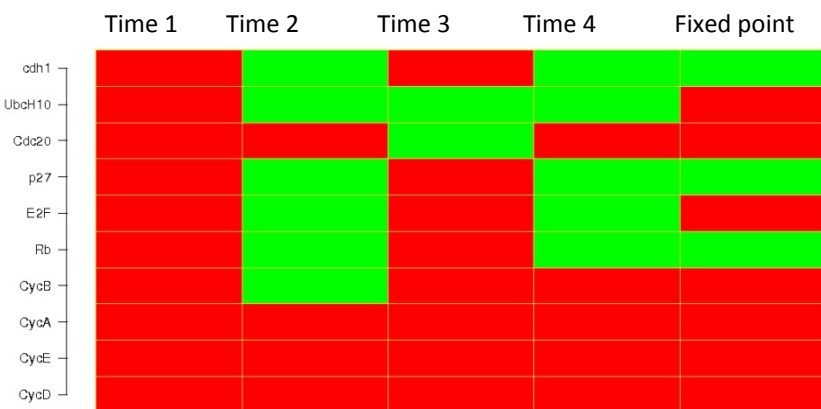

CycD = 0 → fixed point (G1 arrest : Rb p27 Cdh1)

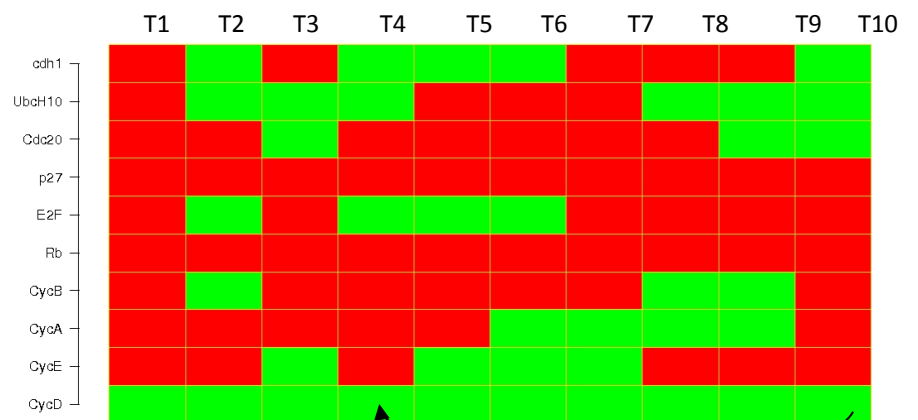

CycD = 1 → cyclic attractor

Cycle

## (3) MaBoSS results

Two indecomposable stationary distributions (clusters):

- One fixed point: Rb = 1, CDH1 = 1, p27 = 1 (not shown)
- One multi-cyclic attractor

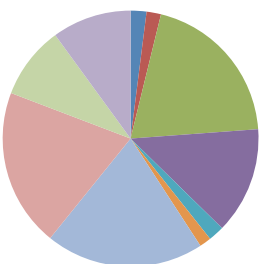

- Prob[CycD--cdh1--CycA | Cluster #1]
- Prob[CycD--Cdc20--UbcH10--cdh1 | Cluster #1]
- Prob[CycD--E2F--CycE--cdh1 | Cluster #1]
- Prob[CycD--cdh1 | Cluster #1]
- Prob[CycD--Cdc20--UbcH10--cdh1--CycB | Cluster #1]
- Prob[CycD--UbcH10--cdh1 | Cluster #1]
- Prob[CycD--UbcH10--CycA | Cluster #1]
- Prob[CycD--UbcH10--CycA--CycB | Cluster #1]
- Prob[CycD--E2F--cdh1 | Cluster #1]
- Prob[CycD--CycA | Cluster #1]

Time dependent activity of cyclins (initial condition: CycD=1)

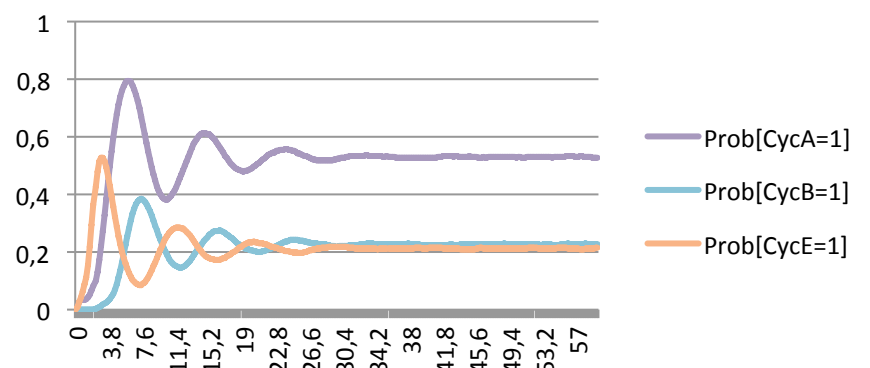

Supplement: 1752-0509-6-116-S2.pdf [file 1752-0509-6-116-S2.pdf]
